# Supplementary material for: Vitamin D stimulates multiple microRNAs to inhibit CRH and other pro-labor genes in human placenta
Source: PubMed Central journal article supplement — Endocr Connect. 2018 Nov 5;7(12):1380–8. doi: 10.1530/EC-18-0345 (PMC6280586; doi:10.1530/ec-18-0345), 2018-11-05
Supplement: EC-18-0345-t001.pdf [file EC-18-0345-t001.pdf]

**Supplementary Table 1. 542 MicroRNA Genes Significantly Associated with 1,25(OH)<sub>2</sub>D-VDR in Human STB (p < 0.05)**

| Chromosome | Region                           | Name       | ENSEMBL                         | Bio-type | Peak shape score | P-value     |
|------------|----------------------------------|------------|---------------------------------|----------|------------------|-------------|
| 1          | complement(2222427..2222500)     | AL590822.1 | <a href="#">ENSG00000277082</a> | miRNA    | 2.102654947      | 0.017747972 |
| 1          | 5564071..5564143                 | MIR4417    | <a href="#">ENSG00000264341</a> | miRNA    | 3.396706389      | 0.000341011 |
| 1          | complement(18897071..18897148)   | MIR1290    | <a href="#">ENSG00000221662</a> | miRNA    | 3.749051749      | 8.87522E-05 |
| 1          | 20633679..20633788               | MIR6084    | <a href="#">ENSG00000273695</a> | miRNA    | 1.893511128      | 0.029144965 |
| 1          | 22719517..22719598               | MIR4684    | <a href="#">ENSG00000265422</a> | miRNA    | 2.124629627      | 0.016808765 |
| 1          | complement(24279767..24279855)   | AL590683.2 | <a href="#">ENSG00000266511</a> | miRNA    | 1.818227056      | 0.034514718 |
| 1          | complement(30739156..30739232)   | MIR4420    | <a href="#">ENSG00000264773</a> | miRNA    | 2.93326494       | 0.001677088 |
| 1          | 32086949..32087007               | MIR5585    | <a href="#">ENSG00000266203</a> | miRNA    | 2.700171829      | 0.003465184 |
| 1          | 37161563..37161634               | MIR4255    | <a href="#">ENSG00000264698</a> | miRNA    | 1.883838111      | 0.029793438 |
| 1          | complement(67239440..67239527)   | AL109843.1 | <a href="#">ENSG00000221733</a> | miRNA    | 3.835636387      | 6.26198E-05 |
| 1          | complement(68183518..68183610)   | MIR1262    | <a href="#">ENSG00000221203</a> | miRNA    | 2.065156644      | 0.019454091 |
| 1          | 81990753..81990806               | AC113949.1 | <a href="#">ENSG00000274207</a> | miRNA    | 8.076196625      | 3.34091E-16 |
| 1          | 86952923..86953016               | AL121989.1 | <a href="#">ENSG00000280842</a> | miRNA    | 2.023505746      | 0.021510516 |
| 1          | 96935545..96935663               | AL592205.2 | <a href="#">ENSG00000265771</a> | miRNA    | 2.547787432      | 0.005420425 |
| 1          | complement(98045242..98045351)   | MIR2682    | <a href="#">ENSG00000276280</a> | miRNA    | 2.090853504      | 0.018270599 |
| 1          | 150551929..150552014             | MIR4257    | <a href="#">ENSG00000264553</a> | miRNA    | 3.551371055      | 0.000191615 |
| 1          | 151545796..151545891             | MIR554     | <a href="#">ENSG00000207606</a> | miRNA    | 2.428547253      | 0.007579725 |
| 1          | complement(153962351..153962420) | MIR6737    | <a href="#">ENSG00000276584</a> | miRNA    | 4.262421869      | 1.01112E-05 |
| 1          | 156077373..156077454             | AL355388.1 | <a href="#">ENSG00000222611</a> | miRNA    | 2.139365927      | 0.016203022 |
| 1          | 162157107..162157182             | MIR4654    | <a href="#">ENSG00000266144</a> | miRNA    | 5.779286807      | 3.7509E-09  |
| 1          | 177111386..177111510             | AL021398.2 | <a href="#">ENSG00000280731</a> | miRNA    | 2.801801622      | 0.002540906 |
| 1          | complement(180438314..180438390) | MIR3121    | <a href="#">ENSG00000265435</a> | miRNA    | 4.89993053       | 4.79353E-07 |
| 1          | 193136503..193136583             | MIR1278    | <a href="#">ENSG00000221680</a> | miRNA    | 1.812028419      | 0.034990903 |
| 1          | 206024548..206024683             | BX571818.1 | <a href="#">ENSG00000280687</a> | miRNA    | 2.330470775      | 0.009890641 |
| 1          | complement(207801845..207801956) | MIR29C     | <a href="#">ENSG00000275668</a> | miRNA    | 1.873084317      | 0.030528371 |
| 1          | 209432133..209432242             | MIR205     | <a href="#">ENSG00000276335</a> | miRNA    | 2.356504499      | 0.009223922 |
| 1          | 227645280..227645366             | AL592310.1 | <a href="#">ENSG00000265216</a> | miRNA    | 1.901825474      | 0.028596987 |
| 1          | 228097263..228097341             | MIR3620    | <a href="#">ENSG00000264944</a> | miRNA    | 2.658980171      | 0.003918879 |
| 1          | 228457435..228457572             | AL139288.1 | <a href="#">ENSG00000281451</a> | miRNA    | 3.210981872      | 0.000661411 |
| 1          | complement(235190034..235190116) | MIR4753    | <a href="#">ENSG00000263439</a> | miRNA    | 1.653645746      | 0.049099756 |
| 1          | complement(235245866..235245955) | AL391994.1 | <a href="#">ENSG00000280869</a> | miRNA    | 2.634237028      | 0.00421633  |
| 2          | 12737367..12737444               | MIR3125    | <a href="#">ENSG00000264370</a> | miRNA    | 1.98656371       | 0.023485383 |
| 2          | 25722192..25722296               | AC010150.2 | <a href="#">ENSG00000222070</a> | miRNA    | 2.90541131       | 0.001833854 |
| 2          | complement(29081270..29081351)   | AC105398.1 | <a href="#">ENSG00000263957</a> | miRNA    | 3.360280135      | 0.000389317 |
| 2          | complement(31919862..31919949)   | AL121652.1 | <a href="#">ENSG00000221326</a> | miRNA    | 3.133524766      | 0.000863602 |
| 2          | 55472744..55472841               | AC019198.1 | <a href="#">ENSG00000264849</a> | miRNA    | 2.834228569      | 0.002296823 |
| 2          | 61177554..61177636               | AC016747.1 | <a href="#">ENSG00000280672</a> | miRNA    | 1.707497889      | 0.043864775 |
| 2          | complement(66358249..66358328)   | MIR4778    | <a href="#">ENSG00000264525</a> | miRNA    | 1.803610583      | 0.035646188 |
| 2          | 68273104..68273206               | AC017083.1 | <a href="#">ENSG00000221443</a> | miRNA    | 1.904686541      | 0.028410415 |
| 2          | 79794270..79794381               | AC096753.1 | <a href="#">ENSG00000263566</a> | miRNA    | 3.314805144      | 0.000458535 |
| 2          | complement(79866495..79866583)   | MIR8080    | <a href="#">ENSG00000276917</a> | miRNA    | 1.946275548      | 0.025810825 |
| 2          | 80244623..80244718               | AC016670.1 | <a href="#">ENSG00000221179</a> | miRNA    | 2.251698558      | 0.012170664 |
| 2          | 85299034..85299118               | AC093162.1 | <a href="#">ENSG00000221579</a> | miRNA    | 4.813692942      | 7.40832E-07 |

|   |                                      |            |                                 |       |             |             |
|---|--------------------------------------|------------|---------------------------------|-------|-------------|-------------|
| 2 | complement(85567662<br>..85567737)   | AC016753.1 | <a href="#">ENSG00000280656</a> | miRNA | 2.085854201 | 0.018495916 |
| 2 | complement(88055665<br>..88055791)   | AC108479.3 | <a href="#">ENSG00000275955</a> | miRNA | 3.575653079 | 0.000174677 |
| 2 | 101231916..10123204<br>9             | AC013722.1 | <a href="#">ENSG00000280738</a> | miRNA | 1.725235858 | 0.042242488 |
| 2 | complement(10448825<br>7..104488351) | AC068535.1 | <a href="#">ENSG00000280979</a> | miRNA | 3.244002626 | 0.000589313 |
| 2 | complement(11012673<br>2..110126824) | AC013268.1 | <a href="#">ENSG00000212091</a> | miRNA | 3.562464162 | 0.000183695 |
| 2 | 113596000..11359606<br>7             | AL078621.1 | <a href="#">ENSG00000276624</a> | miRNA | 1.70820938  | 0.043798749 |
| 2 | 117026331..11702639<br>6             | AC012365.1 | <a href="#">ENSG00000274027</a> | miRNA | 3.680518671 | 0.00011638  |
| 2 | complement(12512707<br>1..125127154) | AC104842.1 | <a href="#">ENSG00000281413</a> | miRNA | 2.89467296  | 0.001897769 |
| 2 | 130183443..13018351<br>9             | AC018804.1 | <a href="#">ENSG00000265280</a> | miRNA | 1.655828459 | 0.048878281 |
| 2 | 132523985..13252409<br>2             | AC104405.1 | <a href="#">ENSG00000221142</a> | miRNA | 1.921023678 | 0.027364361 |
| 2 | 136544371..13654448<br>0             | AC010146.2 | <a href="#">ENSG00000216081</a> | miRNA | 1.915815129 | 0.027694316 |
| 2 | complement(13664510<br>8..136645192) | AC092786.1 | <a href="#">ENSG00000221762</a> | miRNA | 2.259773289 | 0.011917663 |
| 2 | complement(15693216<br>8..156932264) | AC096589.1 | <a href="#">ENSG00000281222</a> | miRNA | 2.159152767 | 0.015419159 |
| 2 | complement(16212173<br>1..162121816) | AC007750.1 | <a href="#">ENSG00000274689</a> | miRNA | 5.213231603 | 9.27895E-08 |
| 2 | complement(17516763<br>3..175167709) | MIR933     | <a href="#">ENSG00000215973</a> | miRNA | 1.71629602  | 0.043053938 |
| 2 | complement(17731380<br>6..177313882) | MIR6512    | <a href="#">ENSG00000278418</a> | miRNA | 3.588191989 | 0.00016649  |
| 2 | complement(18208842<br>9..182088616) | AC064837.1 | <a href="#">ENSG00000265129</a> | miRNA | 2.033946351 | 0.020978502 |
| 2 | complement(18774258<br>7..187742674) | AC068718.1 | <a href="#">ENSG00000252004</a> | miRNA | 3.154898346 | 0.00080277  |
| 2 | complement(18931167<br>1..189311761) | AC118063.1 | <a href="#">ENSG00000266817</a> | miRNA | 1.751904242 | 0.039895138 |
| 2 | complement(19455817<br>4..194558274) | AC073973.1 | <a href="#">ENSG00000264560</a> | miRNA | 1.730482865 | 0.04177202  |
| 2 | 201756774..20175689<br>8             | AC007279.1 | <a href="#">ENSG00000281201</a> | miRNA | 1.855293045 | 0.031777195 |
| 2 | complement(20376470<br>7..203764798) | AC125238.1 | <a href="#">ENSG00000211573</a> | miRNA | 1.696328644 | 0.044911829 |
| 2 | 218402637..21840274<br>6             | MIR26B     | <a href="#">ENSG00000199121</a> | miRNA | 7.119171161 | 5.79E-14    |
| 2 | complement(21900162<br>8..219001739) | MIR375     | <a href="#">ENSG00000198973</a> | miRNA | 2.103785721 | 0.017698571 |
| 2 | complement(21905868<br>8..219058750) | MIR3131    | <a href="#">ENSG00000264755</a> | miRNA | 3.324492842 | 0.000442898 |
| 2 | 220191878..22019195<br>6             | AC114765.3 | <a href="#">ENSG00000221199</a> | miRNA | 3.39190856  | 0.000347038 |
| 2 | complement(22423946<br>2..224239556) | AC104802.1 | <a href="#">ENSG00000211987</a> | miRNA | 1.698064612 | 0.044747784 |
| 2 | complement(23908569<br>8..239085796) | AC017028.7 | <a href="#">ENSG00000265891</a> | miRNA | 3.302558574 | 0.000479035 |
| 3 | 4782053..4782149                     | AC018816.1 | <a href="#">ENSG00000281217</a> | miRNA | 2.382484709 | 0.008598123 |
| 3 | 10330192..10330300                   | AC022384.1 | <a href="#">ENSG00000264534</a> | miRNA | 1.913431285 | 0.027846431 |
| 3 | complement(12840294<br>..12840396)   | AC034198.1 | <a href="#">ENSG00000281117</a> | miRNA | 2.063082473 | 0.019552397 |
| 3 | 14535694..14535797                   | AC090952.1 | <a href="#">ENSG00000280472</a> | miRNA | 3.329973605 | 0.000434271 |
| 3 | 16933196..16933260                   | MIR3714    | <a href="#">ENSG00000264818</a> | miRNA | 6.771932812 | 6.35E-12    |
| 3 | 23767611..23767704                   | AC020626.1 | <a href="#">ENSG00000238672</a> | miRNA | 1.656329236 | 0.048827582 |
| 3 | complement(27362566<br>..27362658)   | AC099535.1 | <a href="#">ENSG00000221573</a> | miRNA | 1.6846356   | 0.046029449 |
| 3 | complement(29369337<br>..29369421)   | AC098650.1 | <a href="#">ENSG00000216169</a> | miRNA | 4.138766466 | 1.74589E-05 |
| 3 | complement(32506283<br>..32506389)   | MIR548AY   | <a href="#">ENSG00000276147</a> | miRNA | 2.691926946 | 0.003552025 |
| 3 | 35744476..35744559                   | MIR128-2   | <a href="#">ENSG00000207625</a> | miRNA | 2.026672568 | 0.021347955 |
| 3 | complement(49099854<br>..49099914)   | MIR6890    | <a href="#">ENSG00000274888</a> | miRNA | 2.012956267 | 0.022059615 |
| 3 | 50273236..50273297                   | MIR6872    | <a href="#">ENSG00000274596</a> | miRNA | 2.783398357 | 0.002689636 |
| 3 | 51719610..51719760                   | AC099050.1 | <a href="#">ENSG00000278290</a> | miRNA | 1.862115714 | 0.031293391 |
| 3 | complement(52294219<br>..52294308)   | MIR135A1   | <a href="#">ENSG00000207926</a> | miRNA | 2.204462772 | 0.013745908 |
| 3 | 75630763..75630858                   | MIR1324    | <a href="#">ENSG00000221795</a> | miRNA | 2.605465485 | 0.004587476 |

|   |                                  |            |                                 |       |             |             |
|---|----------------------------------|------------|---------------------------------|-------|-------------|-------------|
| 3 | complement(96666194..96666279)   | AC117444.1 | <a href="#">ENSG00000212031</a> | miRNA | 1.708778996 | 0.043745947 |
| 3 | complement(103524033..103524116) | MIR548AB   | <a href="#">ENSG00000265328</a> | miRNA | 1.717404392 | 0.042952655 |
| 3 | complement(104054708..104054796) | AC016970.1 | <a href="#">ENSG00000265076</a> | miRNA | 1.705275131 | 0.044071562 |
| 3 | complement(113092444..113092525) | AC078785.1 | <a href="#">ENSG00000238593</a> | miRNA | 1.834621524 | 0.033280894 |
| 3 | 113594876..113594942             | MIR4446    | <a href="#">ENSG00000265253</a> | miRNA | 1.767915842 | 0.038537487 |
| 3 | complement(124061994..124062084) | AC117401.1 | <a href="#">ENSG00000238512</a> | miRNA | 3.53989253  | 0.000200145 |
| 3 | 124132929..124133025             | MIR5002    | <a href="#">ENSG00000266383</a> | miRNA | 2.630916358 | 0.00425775  |
| 3 | complement(125151465..125151552) | MIR5092    | <a href="#">ENSG00000264986</a> | miRNA | 3.606437174 | 0.000155215 |
| 3 | complement(129316261..129316391) | AC137695.1 | <a href="#">ENSG00000280727</a> | miRNA | 2.217627819 | 0.01329011  |
| 3 | 134437827..134437906             | MIR4788    | <a href="#">ENSG00000263554</a> | miRNA | 3.228393027 | 0.000622439 |
| 3 | 149766814..149766883             | AC069216.1 | <a href="#">ENSG00000281611</a> | miRNA | 1.855239122 | 0.031781044 |
| 3 | 151024046..151024181             | AC020636.1 | <a href="#">ENSG00000281338</a> | miRNA | 2.794220863 | 0.002601247 |
| 3 | complement(152919730..152919796) | AC013251.1 | <a href="#">ENSG00000273789</a> | miRNA | 3.665570937 | 0.000123394 |
| 3 | complement(157371476..157371601) | AC092944.1 | <a href="#">ENSG00000280625</a> | miRNA | 2.459999992 | 0.006946851 |
| 3 | 175369540..175369621             | MIR4789    | <a href="#">ENSG00000264974</a> | miRNA | 2.231505043 | 0.012823847 |
| 3 | 188688781..188688866             | MIR28      | <a href="#">ENSG00000207651</a> | miRNA | 2.695713898 | 0.003511898 |
| 3 | 189829922..189830009             | MIR944     | <a href="#">ENSG00000216058</a> | miRNA | 2.428352461 | 0.007583797 |
| 3 | 195699401..195699497             | MIR570     | <a href="#">ENSG00000207650</a> | miRNA | 2.204747232 | 0.013735918 |
| 4 | 65125..65233                     | AC253576.1 | <a href="#">ENSG00000207643</a> | miRNA | 2.383785552 | 0.008567792 |
| 4 | 136461..136568                   | AC253576.2 | <a href="#">ENSG00000211553</a> | miRNA | 3.025944454 | 0.001239289 |
| 4 | 224215..224323                   | AC079140.1 | <a href="#">ENSG00000252616</a> | miRNA | 4.186156319 | 1.41859E-05 |
| 4 | complement(1869153..1869214)     | RN7SL671P  | <a href="#">ENSG00000240455</a> | miRNA | 2.357546837 | 0.009198067 |
| 4 | complement(8005301..8005381)     | MIR95      | <a href="#">ENSG00000207807</a> | miRNA | 2.855870207 | 0.002145953 |
| 4 | complement(40502040..40502119)   | MIR4802    | <a href="#">ENSG00000263642</a> | miRNA | 1.949856014 | 0.025596642 |
| 4 | 44448005..44448110               | AC131951.1 | <a href="#">ENSG00000266496</a> | miRNA | 3.065649277 | 0.00108599  |
| 4 | 49198207..49198289               | AC118282.1 | <a href="#">ENSG00000221415</a> | miRNA | 4.898229859 | 4.83519E-07 |
| 4 | 49209372..49209448               | AC118282.4 | <a href="#">ENSG00000281200</a> | miRNA | 2.394444786 | 0.008322775 |
| 4 | complement(56794354..56794438)   | AC022483.1 | <a href="#">ENSG00000281241</a> | miRNA | 1.936467097 | 0.026405259 |
| 4 | complement(101240795..101240872) | MIR8066    | <a href="#">ENSG00000273882</a> | miRNA | 3.099002899 | 0.000970866 |
| 4 | complement(102565875..102565967) | AF213884.3 | <a href="#">ENSG00000238553</a> | miRNA | 3.451800823 | 0.000278429 |
| 4 | complement(104278107..104278191) | AC004052.1 | <a href="#">ENSG00000215999</a> | miRNA | 2.481927517 | 0.006533693 |
| 4 | 104490876..104490954             | AC093628.1 | <a href="#">ENSG00000272082</a> | miRNA | 3.43248435  | 0.000299039 |
| 4 | complement(112648363..112648430) | MIR302C    | <a href="#">ENSG00000199102</a> | miRNA | 2.757446745 | 0.002912735 |
| 4 | complement(133560856..133560934) | AC105252.1 | <a href="#">ENSG00000221637</a> | miRNA | 3.145322779 | 0.000829518 |
| 4 | 143343460..143343535             | MIR3139    | <a href="#">ENSG00000265623</a> | miRNA | 2.066849198 | 0.019374183 |
| 4 | 146639261..146639343             | AC093887.1 | <a href="#">ENSG00000264323</a> | miRNA | 1.880549595 | 0.030016607 |
| 4 | 147782595..147782668             | MIR4799    | <a href="#">ENSG00000264274</a> | miRNA | 2.75360142  | 0.002947175 |
| 4 | complement(159722801..159722885) | AC097466.1 | <a href="#">ENSG00000274246</a> | miRNA | 2.676180529 | 0.003723326 |
| 4 | complement(184267357..184267431) | AC079080.1 | <a href="#">ENSG00000221523</a> | miRNA | 1.781729065 | 0.037396712 |
| 4 | complement(184938383..184938440) | MIR4455    | <a href="#">ENSG00000263458</a> | miRNA | 1.989162155 | 0.023341654 |
| 4 | 188207839..188207890             | AC138781.1 | <a href="#">ENSG00000281034</a> | miRNA | 1.662538537 | 0.048202422 |
| 5 | complement(1569421..)            | AC091849.1 | <a href="#">ENSG00000278350</a> | miRNA | 1.821384269 | 0.034274232 |

|   |                                      |            |                                 |       |             |             |
|---|--------------------------------------|------------|---------------------------------|-------|-------------|-------------|
|   | 1569533)                             |            |                                 |       |             |             |
| 5 | complement(13919797<br>..13919874)   | AC016576.1 | <a href="#">ENSG00000280702</a> | miRNA | 4.891805745 | 4.99575E-07 |
| 5 | 15935159..15935272                   | MIR887     | <a href="#">ENSG00000216077</a> | miRNA | 1.826200088 | 0.033910064 |
| 5 | complement(32394378<br>..32394475)   | MIR579     | <a href="#">ENSG00000207956</a> | miRNA | 2.744864123 | 0.003026798 |
| 5 | complement(36147892<br>..36147988)   | MIR580     | <a href="#">ENSG00000207756</a> | miRNA | 1.979337219 | 0.023889026 |
| 5 | complement(38557502<br>..38557561)   | MIR3650    | <a href="#">ENSG00000265304</a> | miRNA | 2.456637789 | 0.0070122   |
| 5 | 40320318..40320415                   | AC108105.1 | <a href="#">ENSG00000265615</a> | miRNA | 2.217831328 | 0.013283168 |
| 5 | 53609587..53609658                   | AC024569.1 | <a href="#">ENSG00000238508</a> | miRNA | 2.647367681 | 0.004056055 |
| 5 | 53942646..53942746                   | AC024571.1 | <a href="#">ENSG00000281639</a> | miRNA | 1.992155149 | 0.023177019 |
| 5 | complement(53951504<br>..53951599)   | MIR581     | <a href="#">ENSG00000207627</a> | miRNA | 1.878751922 | 0.030139187 |
| 5 | complement(55170532<br>..55170622)   | MIR449A    | <a href="#">ENSG00000198983</a> | miRNA | 2.311044979 | 0.010415185 |
| 5 | 55406321..55406422                   | AC010480.1 | <a href="#">ENSG00000280573</a> | miRNA | 2.47854829  | 0.006595913 |
| 5 | complement(58530043<br>..58530109)   | MIR548AE2  | <a href="#">ENSG00000265699</a> | miRNA | 2.274466305 | 0.011468982 |
| 5 | 72169467..72169540                   | MIR4803    | <a href="#">ENSG00000264099</a> | miRNA | 4.476249079 | 3.79829E-06 |
| 5 | 72878591..72878663                   | MIR4804    | <a href="#">ENSG00000263593</a> | miRNA | 1.904676135 | 0.028411092 |
| 5 | complement(83973796<br>..83973886)   | AC109496.1 | <a href="#">ENSG00000216125</a> | miRNA | 2.511202293 | 0.006016036 |
| 5 | 96079138..96079212                   | MIR583     | <a href="#">ENSG00000207578</a> | miRNA | 2.150069463 | 0.01577486  |
| 5 | complement(11290563<br>8..112905737) | AC008536.1 | <a href="#">ENSG00000266499</a> | miRNA | 2.98434581  | 0.001420927 |
| 5 | complement(11925734<br>0..119257437) | AC027320.1 | <a href="#">ENSG00000266587</a> | miRNA | 2.125704924 | 0.016763918 |
| 5 | 134225757..13422585<br>2             | MIR3661    | <a href="#">ENSG00000266751</a> | miRNA | 3.38123124  | 0.000360809 |
| 5 | complement(14498470<br>8..144984852) | AC005371.1 | <a href="#">ENSG00000281461</a> | miRNA | 1.725464235 | 0.042221922 |
| 5 | complement(14906230<br>4..149062414) | MIR584     | <a href="#">ENSG00000207714</a> | miRNA | 3.991201072 | 3.28698E-05 |
| 5 | complement(15152208<br>7..151522148) | MIR6499    | <a href="#">ENSG00000276622</a> | miRNA | 2.447403132 | 0.00719449  |
| 5 | 155845469..15584552<br>7             | AC140677.1 | <a href="#">ENSG00000280546</a> | miRNA | 3.586952047 | 0.000167283 |
| 5 | complement(16926360<br>1..169263694) | MIR585     | <a href="#">ENSG00000207619</a> | miRNA | 1.972913896 | 0.024252687 |
| 5 | complement(17979827<br>8..179798346) | MIR1229    | <a href="#">ENSG00000221394</a> | miRNA | 2.378505496 | 0.008691489 |
| 6 | complement(16428444<br>..16428523)   | AL034375.1 | <a href="#">ENSG00000265642</a> | miRNA | 2.775055962 | 0.00275961  |
| 6 | 16897425..16897489                   | AL591610.1 | <a href="#">ENSG00000221492</a> | miRNA | 1.697858071 | 0.044767276 |
| 6 | complement(26124436<br>..26124576)   | U91328.1   | <a href="#">ENSG00000281052</a> | miRNA | 3.244467285 | 0.000588353 |
| 6 | 26198861..26198997                   | AL031777.2 | <a href="#">ENSG00000281823</a> | miRNA | 2.521309117 | 0.005845955 |
| 6 | complement(27147375<br>..27147516)   | AL021807.1 | <a href="#">ENSG00000280696</a> | miRNA | 1.897574227 | 0.028876096 |
| 6 | 27631409..27631532                   | TRI-TAT2-3 | <a href="#">ENSG00000238648</a> | miRNA | 1.676958038 | 0.046775344 |
| 6 | 30584312..30584425                   | MIR877     | <a href="#">ENSG00000216101</a> | miRNA | 2.336751519 | 0.009726054 |
| 6 | complement(33287227<br>..33287289)   | MIR6873    | <a href="#">ENSG00000274694</a> | miRNA | 1.743773664 | 0.040599282 |
| 6 | 33290245..33290325                   | MIR6834    | <a href="#">ENSG00000275010</a> | miRNA | 1.845704994 | 0.032467526 |
| 6 | 33438331..33438437                   | MIR5004    | <a href="#">ENSG00000264085</a> | miRNA | 1.727474903 | 0.042041204 |
| 6 | 33899135..33899200                   | MIR7159    | <a href="#">ENSG00000276824</a> | miRNA | 2.986252737 | 0.001412096 |
| 6 | complement(37555365<br>..37555422)   | MIR4462    | <a href="#">ENSG00000263926</a> | miRNA | 3.129425973 | 0.000875741 |
| 6 | 44013001..44013101                   | AL109615.1 | <a href="#">ENSG00000265518</a> | miRNA | 2.658696233 | 0.003922183 |
| 6 | 60291693..60291774                   | AC244258.1 | <a href="#">ENSG00000212065</a> | miRNA | 3.209510659 | 0.000664806 |
| 6 | 64974393..64974492                   | AL109922.1 | <a href="#">ENSG00000221312</a> | miRNA | 3.132353477 | 0.000867055 |
| 6 | complement(67149509<br>..67149599)   | AL590874.1 | <a href="#">ENSG00000266073</a> | miRNA | 2.045494296 | 0.020403075 |
| 6 | complement(72967687<br>..72967753)   | MIR4282    | <a href="#">ENSG00000266180</a> | miRNA | 3.868147205 | 5.48327E-05 |
| 6 | 83367706..83367791                   | AL391416.1 | <a href="#">ENSG00000252309</a> | miRNA | 2.512715353 | 0.005990298 |
| 6 | complement(89176543<br>..89176677)   | AL353135.1 | <a href="#">ENSG00000281765</a> | miRNA | 1.691890691 | 0.045333409 |
| 6 | 99124609..99124696                   | MIR548AI   | <a href="#">ENSG00000265226</a> | miRNA | 2.052123781 | 0.020078817 |
| 6 | complement(13471517<br>6..134715266) | AL121970.1 | <a href="#">ENSG00000277231</a> | miRNA | 1.879799738 | 0.030067688 |
| 6 | 137716950..13771707<br>9             | AL357060.1 | <a href="#">ENSG00000251969</a> | miRNA | 3.021279253 | 0.001258546 |
| 6 | 140205252..14020532<br>6             | MIR3668    | <a href="#">ENSG00000263514</a> | miRNA | 2.199136379 | 0.013934113 |

|   |                                  |            |                                 |       |             |             |
|---|----------------------------------|------------|---------------------------------|-------|-------------|-------------|
| 6 | 153344113..153344215             | AL358134.1 | <a href="#">ENSG00000264321</a> | miRNA | 1.897584125 | 0.028875444 |
| 6 | 154881282..154881370             | AL121952.1 | <a href="#">ENSG00000223286</a> | miRNA | 4.482653019 | 3.69E-06    |
| 6 | complement(166509354..166509433) | MIR1913    | <a href="#">ENSG00000222958</a> | miRNA | 2.886797692 | 0.001945922 |
| 6 | complement(166997807..166997912) | MIR3939    | <a href="#">ENSG00000265828</a> | miRNA | 2.040101637 | 0.020670102 |
| 7 | complement(1844180..1844253)     | MIR4655    | <a href="#">ENSG00000265089</a> | miRNA | 1.915875957 | 0.027690443 |
| 7 | 2527074..2527145                 | MIR4648    | <a href="#">ENSG00000264357</a> | miRNA | 2.642096319 | 0.004119731 |
| 7 | complement(7068187..7068269)     | AC092104.5 | <a href="#">ENSG00000266409</a> | miRNA | 3.476420219 | 0.000254078 |
| 7 | complement(9594617..9594723)     | AC079756.1 | <a href="#">ENSG00000264766</a> | miRNA | 2.236163596 | 0.012670528 |
| 7 | complement(36919357..36919432)   | MIR1200    | <a href="#">ENSG00000221325</a> | miRNA | 2.036828879 | 0.020833597 |
| 7 | 44051766..44051829               | MIR6837    | <a href="#">ENSG00000274083</a> | miRNA | 2.635832599 | 0.004196556 |
| 7 | complement(70882405..70882540)   | AC073873.1 | <a href="#">ENSG00000281437</a> | miRNA | 2.456951262 | 0.007006085 |
| 7 | 90171341..90171424               | AC004969.1 | <a href="#">ENSG00000223029</a> | miRNA | 2.778766962 | 0.002728283 |
| 7 | 98881650..98881729               | MIR3609    | <a href="#">ENSG00000266019</a> | miRNA | 2.243072017 | 0.012446085 |
| 7 | complement(100093560..100093643) | MIR25      | <a href="#">ENSG00000207547</a> | miRNA | 2.726675799 | 0.003198793 |
| 7 | complement(100156605..100156669) | MIR4658    | <a href="#">ENSG00000266154</a> | miRNA | 3.510860939 | 0.000223329 |
| 7 | complement(100220027..100220120) | AC005071.1 | <a href="#">ENSG00000222482</a> | miRNA | 1.84892954  | 0.032233994 |
| 7 | 100372544..100372609             | AC005071.2 | <a href="#">ENSG00000278832</a> | miRNA | 2.124810559 | 0.016801212 |
| 7 | 114653345..114653455             | MIR3666    | <a href="#">ENSG00000272230</a> | miRNA | 1.944002265 | 0.025947589 |
| 7 | 118462499..118462594             | AC006926.1 | <a href="#">ENSG00000222226</a> | miRNA | 2.311023649 | 0.010415774 |
| 7 | complement(120009634..120009701) | AC004915.1 | <a href="#">ENSG00000276899</a> | miRNA | 2.6606463   | 0.003899542 |
| 7 | 126040229..126040300             | AC003968.1 | <a href="#">ENSG00000221418</a> | miRNA | 3.565873494 | 0.000181323 |
| 7 | complement(127120442..127120546) | AC000354.1 | <a href="#">ENSG00000280995</a> | miRNA | 3.361783828 | 0.000387204 |
| 7 | 128906772..128906890             | AC025594.1 | <a href="#">ENSG00000221401</a> | miRNA | 2.638994058 | 0.004157622 |
| 7 | complement(129774905..129775014) | MIR183     | <a href="#">ENSG00000207691</a> | miRNA | 7.182169592 | 5.47E-14    |
| 7 | complement(130876735..130876821) | MIR29A     | <a href="#">ENSG00000277934</a> | miRNA | 8.124316792 | 1.12E-16    |
| 7 | 136052813..136052917             | AC024084.2 | <a href="#">ENSG00000274268</a> | miRNA | 2.818757977 | 0.002410493 |
| 7 | 138123758..138123821             | MIR4468    | <a href="#">ENSG00000266193</a> | miRNA | 2.342268939 | 0.009583449 |
| 7 | complement(149541747..149541846) | AC004932.1 | <a href="#">ENSG00000280992</a> | miRNA | 2.104626187 | 0.01766193  |
| 8 | 1817231..1817307                 | MIR596     | <a href="#">ENSG00000207826</a> | miRNA | 2.022005637 | 0.021587885 |
| 8 | 9048445..9048518                 | MIR4660    | <a href="#">ENSG00000263407</a> | miRNA | 1.825717701 | 0.033946398 |
| 8 | 15521884..15521966               | AC091559.1 | <a href="#">ENSG00000223214</a> | miRNA | 4.123390283 | 1.86668E-05 |
| 8 | 25345402..25345474               | MIR6876    | <a href="#">ENSG00000274988</a> | miRNA | 2.876122514 | 0.002012967 |
| 8 | complement(27886039..27886116)   | MIR4287    | <a href="#">ENSG00000265847</a> | miRNA | 1.807326109 | 0.035355724 |
| 8 | complement(52995348..52995458)   | AC009800.1 | <a href="#">ENSG00000265835</a> | miRNA | 2.367367008 | 0.008957579 |
| 8 | complement(53037629..53037749)   | AC016113.1 | <a href="#">ENSG00000251871</a> | miRNA | 2.391857803 | 0.008381668 |
| 8 | complement(95269616..95269738)   | AC024995.1 | <a href="#">ENSG00000281115</a> | miRNA | 1.822671331 | 0.034176592 |
| 8 | 102125432..102125515             | MIR5680    | <a href="#">ENSG00000266756</a> | miRNA | 1.801374532 | 0.035821934 |
| 8 | 112643493..112643583             | MIR2053    | <a href="#">ENSG00000238399</a> | miRNA | 1.669583653 | 0.047500883 |
| 8 | complement(121186758..121186892) | AC027238.1 | <a href="#">ENSG00000221644</a> | miRNA | 2.315933416 | 0.010280952 |
| 8 | 125524878..125524964             | AC091114.1 | <a href="#">ENSG00000277329</a> | miRNA | 2.214731259 | 0.013389258 |
| 8 | complement(129484057..129484142) | MIR3686    | <a href="#">ENSG00000263763</a> | miRNA | 2.454920637 | 0.007045785 |
| 8 | 141945499..141945625             | AC104417.1 | <a href="#">ENSG00000221123</a> | miRNA | 2.323946583 | 0.010064179 |
| 8 | complement(14373308)             | MIR4664    | <a href="#">ENSG00000265660</a> | miRNA | 2.293977439 | 0.010895897 |

|   |                                  |            |                                 |       |             |             |
|---|----------------------------------|------------|---------------------------------|-------|-------------|-------------|
|   | 3..143733153)                    |            |                                 |       |             |             |
| 8 | complement(143812957..143813042) | MIR937     | <a href="#">ENSG00000216090</a> | miRNA | 2.022081818 | 0.02158395  |
| 8 | complement(143837756..143837816) | MIR6845    | <a href="#">ENSG00000274094</a> | miRNA | 4.511352392 | 3.22078E-06 |
| 8 | complement(143945191..143945279) | MIR661     | <a href="#">ENSG00000207574</a> | miRNA | 2.183896303 | 0.014484934 |
| 8 | complement(144057321..144057380) | MIR6846    | <a href="#">ENSG00000277888</a> | miRNA | 5.99437621  | 1.02134E-09 |
| 8 | complement(144435551..144435619) | MIR6893    | <a href="#">ENSG00000276598</a> | miRNA | 2.233659032 | 0.012752758 |
| 8 | 144853413..144853522             | AF235103.1 | <a href="#">ENSG00000263640</a> | miRNA | 2.948871606 | 0.001594682 |
| 9 | 6007826..6007904                 | MIR4665    | <a href="#">ENSG00000263575</a> | miRNA | 4.548773376 | 2.69798E-06 |
| 9 | complement(28863626..28863706)   | MIR876     | <a href="#">ENSG00000215966</a> | miRNA | 6.462417231 | 5.15218E-11 |
| 9 | complement(30771097..30771199)   | AL590726.2 | <a href="#">ENSG00000221111</a> | miRNA | 3.009880759 | 0.001306751 |
| 9 | complement(33467869..33467935)   | MIR6851    | <a href="#">ENSG00000275651</a> | miRNA | 2.01480331  | 0.021962631 |
| 9 | 34296379..34296430               | AL353662.1 | <a href="#">ENSG00000266881</a> | miRNA | 1.723556532 | 0.042393966 |
| 9 | complement(35811476..35811550)   | AL133410.1 | <a href="#">ENSG00000263448</a> | miRNA | 2.180901319 | 0.014595358 |
| 9 | complement(36499976..36500116)   | AL354932.1 | <a href="#">ENSG00000280576</a> | miRNA | 1.732278933 | 0.041611956 |
| 9 | complement(36864254..36864308)   | MIR4540    | <a href="#">ENSG00000264922</a> | miRNA | 3.243373171 | 0.000590617 |
| 9 | complement(40915323..40915405)   | FP565210.1 | <a href="#">ENSG00000275704</a> | miRNA | 6.391278246 | 8.22524E-11 |
| 9 | complement(40928770..40928852)   | AL353763.1 | <a href="#">ENSG00000278366</a> | miRNA | 5.258789114 | 7.25035E-08 |
| 9 | complement(40929010..40929092)   | MIR1299    | <a href="#">ENSG00000275377</a> | miRNA | 10.76051582 | 2.64367E-27 |
| 9 | 60519734..60519817               | BX088702.1 | <a href="#">ENSG00000274431</a> | miRNA | 3.027712868 | 0.00123206  |
| 9 | 60522897..60522978               | BX088702.3 | <a href="#">ENSG00000277648</a> | miRNA | 8.481504084 | 1.11151E-17 |
| 9 | 60523280..60523362               | BX088702.4 | <a href="#">ENSG00000277886</a> | miRNA | 8.203088589 | 1.17144E-16 |
| 9 | complement(81009486..81009553)   | AL354682.1 | <a href="#">ENSG00000280565</a> | miRNA | 2.391472128 | 0.008390479 |
| 9 | 81887673..81887764               | AL158154.2 | <a href="#">ENSG00000278507</a> | miRNA | 2.431301082 | 0.007522353 |
| 9 | 82705777..82705844               | AL133391.1 | <a href="#">ENSG00000275270</a> | miRNA | 2.744658792 | 0.003028692 |
| 9 | complement(88745836..88745905)   | MIR4289    | <a href="#">ENSG00000265873</a> | miRNA | 4.172291851 | 1.50776E-05 |
| 9 | complement(90023441..90023535)   | MIR4290    | <a href="#">ENSG00000263967</a> | miRNA | 4.037871665 | 2.69692E-05 |
| 9 | 91636251..91636361               | MIR3910-1  | <a href="#">ENSG00000266855</a> | miRNA | 2.95265036  | 0.001575293 |
| 9 | 93819357..93819421               | MIR4291    | <a href="#">ENSG00000265347</a> | miRNA | 5.061563965 | 2.07916E-07 |
| 9 | 94175952..94176043               | MIRLET7A1  | <a href="#">ENSG00000199165</a> | miRNA | 2.230659624 | 0.012851842 |
| 9 | complement(95086012..95086096)   | MIR3074    | <a href="#">ENSG00000207617</a> | miRNA | 4.524724437 | 3.02371E-06 |
| 9 | complement(98229149..98229217)   | MIR6854    | <a href="#">ENSG00000278412</a> | miRNA | 2.373680923 | 0.008805881 |
| 9 | 119511669..119511760             | AC006288.1 | <a href="#">ENSG00000276419</a> | miRNA | 1.940909648 | 0.026134619 |
| 9 | 119884947..119885056             | AL354931.1 | <a href="#">ENSG00000281143</a> | miRNA | 2.169702064 | 0.015014712 |
| 9 | 124693710..124693798             | MIR181B2   | <a href="#">ENSG00000207737</a> | miRNA | 5.970703716 | 1.18116E-09 |
| 9 | complement(126530915..126530991) | AL356309.1 | <a href="#">ENSG00000221768</a> | miRNA | 3.786934176 | 7.62587E-05 |
| 9 | complement(128257707..128257789) | AL590708.1 | <a href="#">ENSG00000221297</a> | miRNA | 2.956600023 | 0.001555257 |
| 9 | 129040566..129040674             | AL592211.1 | <a href="#">ENSG00000280692</a> | miRNA | 1.702740699 | 0.044308302 |
| 9 | 129478556..129478652             | AL353803.1 | <a href="#">ENSG00000264298</a> | miRNA | 2.196655004 | 0.014022547 |
| 9 | 132945707..132945771             | MIR548AW   | <a href="#">ENSG00000263816</a> | miRNA | 2.370739993 | 0.008876257 |
| 9 | 133051996..133052059             | MIR6877    | <a href="#">ENSG00000273932</a> | miRNA | 4.051424543 | 2.54534E-05 |
| 9 | 134379411..134379472             | MIR4669    | <a href="#">ENSG00000263897</a> | miRNA | 1.82057704  | 0.034335588 |
| 9 | complement(134849487..134849564) | MIR3689A   | <a href="#">ENSG00000265872</a> | miRNA | 2.944347643 | 0.001618181 |
| 9 | complement(134850742..134850807) | MIR3689F   | <a href="#">ENSG00000266514</a> | miRNA | 2.458040746 | 0.006984866 |
| 9 | 136694136..136694262             | AL590226.1 | <a href="#">ENSG00000221693</a> | miRNA | 2.951054637 | 0.001583454 |

|    |                                  |            |                                 |       |             |             |
|----|----------------------------------|------------|---------------------------------|-------|-------------|-------------|
| 9  | 136830957..136831023             | MIR4292    | <a href="#">ENSG00000265806</a> | miRNA | 2.409714424 | 0.007982506 |
| 9  | 137838419..137838516             | MIR602     | <a href="#">ENSG00000207693</a> | miRNA | 2.432460292 | 0.007498318 |
| 10 | complement(2076019..2076089)     | MIR6072    | <a href="#">ENSG00000278069</a> | miRNA | 1.902725393 | 0.028538193 |
| 10 | complement(14383200..14383277)   | MIR4293    | <a href="#">ENSG00000266321</a> | miRNA | 3.857926451 | 5.71765E-05 |
| 10 | complement(23074383..23074478)   | AL139815.1 | <a href="#">ENSG00000221221</a> | miRNA | 2.181278095 | 0.014581427 |
| 10 | complement(27235917..27236000)   | AL160291.1 | <a href="#">ENSG00000263577</a> | miRNA | 2.688789869 | 0.003585577 |
| 10 | complement(32346864..32346946)   | AL391839.1 | <a href="#">ENSG00000222309</a> | miRNA | 1.885931602 | 0.029652086 |
| 10 | complement(35079598..35079680)   | MIR3611    | <a href="#">ENSG00000266228</a> | miRNA | 5.125726858 | 1.48196E-07 |
| 10 | 44034540..44034611               | AL512640.1 | <a href="#">ENSG00000238957</a> | miRNA | 2.895442971 | 0.001893119 |
| 10 | complement(47351740..47351838)   | AL731561.1 | <a href="#">ENSG00000265383</a> | miRNA | 2.03856739  | 0.020746611 |
| 10 | complement(59340779..59340862)   | AC025038.1 | <a href="#">ENSG00000280779</a> | miRNA | 1.861142718 | 0.031362013 |
| 10 | complement(63372942..63373053)   | MIR1296    | <a href="#">ENSG00000221063</a> | miRNA | 2.420886048 | 0.007741365 |
| 10 | complement(69859214..69859299)   | AL138925.1 | <a href="#">ENSG00000266082</a> | miRNA | 4.691024981 | 1.3592E-06  |
| 10 | complement(89063335..89063411)   | MIR4679-2  | <a href="#">ENSG00000265375</a> | miRNA | 1.991505482 | 0.023212672 |
| 10 | complement(89264340..89264406)   | AL353751.1 | <a href="#">ENSG00000266769</a> | miRNA | 2.200518467 | 0.013885066 |
| 10 | 96130031..96130117               | AC021037.1 | <a href="#">ENSG00000273577</a> | miRNA | 1.788878671 | 0.036817179 |
| 10 | complement(97875812..97875897)   | AL139239.1 | <a href="#">ENSG00000265398</a> | miRNA | 1.862015391 | 0.03130046  |
| 10 | complement(101902600..101902658) | AL391827.1 | <a href="#">ENSG00000278628</a> | miRNA | 2.376465374 | 0.008739701 |
| 10 | complement(103394253..103394401) | MIR1307    | <a href="#">ENSG00000221767</a> | miRNA | 1.676578201 | 0.046812496 |
| 10 | complement(104048089..104048186) | MIR936     | <a href="#">ENSG00000216083</a> | miRNA | 1.962485032 | 0.024853021 |
| 10 | complement(104268336..104268405) | MIR4482    | <a href="#">ENSG00000266852</a> | miRNA | 2.000043371 | 0.02274779  |
| 10 | 110898090..110898155             | MIR4680    | <a href="#">ENSG00000265827</a> | miRNA | 2.249146747 | 0.012251581 |
| 10 | 110988926..110989013             | MIR548E    | <a href="#">ENSG00000221214</a> | miRNA | 1.896324445 | 0.028958578 |
| 10 | 119377972..119378043             | MIR4681    | <a href="#">ENSG00000265719</a> | miRNA | 2.321592739 | 0.010127438 |
| 10 | 125842944..125843029             | AL360176.1 | <a href="#">ENSG00000215972</a> | miRNA | 3.745590411 | 8.9985E-05  |
| 10 | complement(133247511..133247620) | MIR202     | <a href="#">ENSG00000278352</a> | miRNA | 3.031109567 | 0.001218284 |
| 11 | complement(9090312..9090379)     | MIR5691    | <a href="#">ENSG00000264984</a> | miRNA | 2.244275653 | 0.012407336 |
| 11 | 12344767..12344861               | AC025300.1 | <a href="#">ENSG00000264283</a> | miRNA | 2.059655112 | 0.019715762 |
| 11 | 15378531..15378615               | AC105179.1 | <a href="#">ENSG00000276762</a> | miRNA | 2.067893093 | 0.019325039 |
| 11 | complement(32497587..32497666)   | AC087653.1 | <a href="#">ENSG00000274141</a> | miRNA | 1.85007811  | 0.032151146 |
| 11 | complement(57137920..57138064)   | AP001786.1 | <a href="#">ENSG00000281575</a> | miRNA | 2.27610845  | 0.01141976  |
| 11 | 57641198..57641286               | MIR130A    | <a href="#">ENSG00000208009</a> | miRNA | 2.554837968 | 0.005663471 |
| 11 | complement(59595077..59595158)   | MIR3162    | <a href="#">ENSG00000264559</a> | miRNA | 1.696001186 | 0.044942828 |
| 11 | complement(64891355..64891439)   | MIR194-2   | <a href="#">ENSG00000277225</a> | miRNA | 1.754397928 | 0.039681173 |
| 11 | 65018505..65018570               | MIR6879    | <a href="#">ENSG00000278851</a> | miRNA | 4.017128027 | 2.94559E-05 |
| 11 | 65649192..65649253               | MIR4489    | <a href="#">ENSG00000265874</a> | miRNA | 2.639298064 | 0.004153895 |
| 11 | complement(66882812..66882870)   | AP003176.1 | <a href="#">ENSG00000274255</a> | miRNA | 3.830055042 | 6.40573E-05 |
| 11 | complement(68505572..68505651)   | AP000807.2 | <a href="#">ENSG00000222339</a> | miRNA | 1.942893764 | 0.026014498 |
| 11 | complement(72615063..72615130)   | MIR139     | <a href="#">ENSG00000272036</a> | miRNA | 2.581090511 | 0.004924438 |
| 11 | 72783530..72783592               | MIR4692    | <a href="#">ENSG00000265064</a> | miRNA | 4.216969095 | 1.23804E-05 |
| 11 | 74399237..74399333               | MIR548AL   | <a href="#">ENSG00000264402</a> | miRNA | 2.191244152 | 0.014217065 |
| 11 | complement(75335092..75335186)   | MIR326     | <a href="#">ENSG00000199090</a> | miRNA | 1.734430539 | 0.04142086  |
| 11 | 75742270..75742331               | AP001922.1 | <a href="#">ENSG00000281528</a> | miRNA | 1.886381615 | 0.029621774 |
| 11 | complement(78973721..78973783)   | AP002958.1 | <a href="#">ENSG00000266550</a> | miRNA | 4.745078762 | 1.04213E-06 |

|    |                                      |            |                                 |       |             |             |
|----|--------------------------------------|------------|---------------------------------|-------|-------------|-------------|
|    | ..78973809)                          |            |                                 |       |             |             |
| 11 | complement(95990932<br>..95991017)   | AP000870.1 | <a href="#">ENSG00000216073</a> | miRNA | 1.926021489 | 0.027050845 |
| 11 | 100794450..10079453<br>5             | AC015600.1 | <a href="#">ENSG00000265208</a> | miRNA | 2.889904659 | 0.001926793 |
| 11 | 111512931..11151304<br>0             | MIR34B     | <a href="#">ENSG00000207811</a> | miRNA | 1.831691545 | 0.033498695 |
| 11 | complement(11982182<br>9..119821927) | AP001994.1 | <a href="#">ENSG00000276827</a> | miRNA | 1.868115746 | 0.03087297  |
| 11 | 130666735..13066680<br>3             | MIR8052    | <a href="#">ENSG00000274999</a> | miRNA | 2.172799077 | 0.014897721 |
| 11 | complement(13389850<br>4..133898581) | MIR4697    | <a href="#">ENSG00000264919</a> | miRNA | 1.976943121 | 0.02402403  |
| 12 | 9127871..9127985                     | AC007436.1 | <a href="#">ENSG00000211542</a> | miRNA | 2.942922708 | 0.001625648 |
| 12 | 12915829..12915918                   | MIR614     | <a href="#">ENSG00000207817</a> | miRNA | 4.426749226 | 4.78319E-06 |
| 12 | complement(14774716<br>..14774860)   | AC010168.1 | <a href="#">ENSG00000281457</a> | miRNA | 1.768730094 | 0.038469464 |
| 12 | complement(33412530<br>..33412611)   | AC023158.1 | <a href="#">ENSG00000281105</a> | miRNA | 2.036051873 | 0.020872573 |
| 12 | complement(43291495<br>..43291580)   | AC079603.1 | <a href="#">ENSG00000215993</a> | miRNA | 1.964874046 | 0.024714409 |
| 12 | 52113925..52114012                   | AC078864.2 | <a href="#">ENSG00000265804</a> | miRNA | 2.217602772 | 0.013290964 |
| 12 | 52951708..52951795                   | AC107016.1 | <a href="#">ENSG00000265039</a> | miRNA | 1.745413272 | 0.040456479 |
| 12 | 57194504..57194576                   | MIR1228    | <a href="#">ENSG00000221365</a> | miRNA | 3.432953123 | 0.000298523 |
| 12 | complement(57519163<br>..57519259)   | MIR616     | <a href="#">ENSG00000208028</a> | miRNA | 2.349815629 | 0.009391356 |
| 12 | 62603671..62603778                   | MIRLET7I   | <a href="#">ENSG00000199179</a> | miRNA | 2.61358706  | 0.004479863 |
| 12 | complement(66023620<br>..66023726)   | MIR6074    | <a href="#">ENSG00000276878</a> | miRNA | 2.590163601 | 0.004796516 |
| 12 | 95308410..95308520                   | MIR331     | <a href="#">ENSG00000199172</a> | miRNA | 2.76829429  | 0.002817527 |
| 12 | 97491900..97491983                   | MIR1251    | <a href="#">ENSG00000221479</a> | miRNA | 2.675084546 | 0.00373552  |
| 12 | 108133601..10813367<br>9             | AC009729.1 | <a href="#">ENSG00000276750</a> | miRNA | 2.006382529 | 0.022407725 |
| 12 | complement(10883690<br>8..108837006) | MIR619     | <a href="#">ENSG00000207622</a> | miRNA | 3.877173598 | 5.28385E-05 |
| 12 | 111304142..11130420<br>9             | MIR6760    | <a href="#">ENSG00000273700</a> | miRNA | 1.989187836 | 0.023340237 |
| 12 | complement(11148747<br>8..111487578) | AC002395.1 | <a href="#">ENSG00000266269</a> | miRNA | 2.433479243 | 0.007477246 |
| 12 | complement(11216325<br>8..112163321) | MIR6861    | <a href="#">ENSG00000273826</a> | miRNA | 2.237041327 | 0.01264182  |
| 12 | complement(11642825<br>2..116428318) | MIR4472-2  | <a href="#">ENSG00000264037</a> | miRNA | 2.424762778 | 0.007659196 |
| 12 | 120723193..12072326<br>6             | MIR4700    | <a href="#">ENSG00000265455</a> | miRNA | 1.985538439 | 0.023542299 |
| 12 | complement(12301066<br>7..123010728) | MIR4304    | <a href="#">ENSG00000265526</a> | miRNA | 3.067608672 | 0.001078895 |
| 12 | 123536409..12353653<br>4             | MIR3908    | <a href="#">ENSG00000266655</a> | miRNA | 3.400241741 | 0.000336632 |
| 12 | complement(12433718<br>1..124337242) | MIR6880    | <a href="#">ENSG00000275967</a> | miRNA | 1.741326746 | 0.04081316  |
| 12 | 128244506..12824457<br>3             | MIR4419B   | <a href="#">ENSG00000265061</a> | miRNA | 2.425441247 | 0.007644895 |
| 13 | complement(33378468<br>..33378566)   | AL139383.1 | <a href="#">ENSG00000277992</a> | miRNA | 2.539669351 | 0.005547866 |
| 13 | 39652578..39652669                   | AL512505.1 | <a href="#">ENSG00000216014</a> | miRNA | 2.782447837 | 0.002697527 |
| 13 | complement(40200007<br>..40200122)   | AL356217.1 | <a href="#">ENSG00000280465</a> | miRNA | 2.087873453 | 0.018404626 |
| 13 | 40810766..40810861                   | MIR621     | <a href="#">ENSG00000207652</a> | miRNA | 2.548333475 | 0.005411947 |
| 13 | complement(43878214<br>..43878307)   | AL512506.1 | <a href="#">ENSG00000276108</a> | miRNA | 1.652355387 | 0.049231062 |
| 13 | complement(44196129<br>..44196200)   | MIR8079    | <a href="#">ENSG00000276319</a> | miRNA | 2.534424694 | 0.005631607 |
| 13 | complement(49996415<br>..49996501)   | MIR3613    | <a href="#">ENSG00000264864</a> | miRNA | 2.134850801 | 0.0163866   |
| 13 | complement(50049108<br>..50049202)   | MIR15A     | <a href="#">ENSG00000275952</a> | miRNA | 2.596516228 | 0.004708723 |
| 13 | 51552589..51552667                   | MIR4703    | <a href="#">ENSG00000266611</a> | miRNA | 1.832594802 | 0.033431426 |
| 13 | 52810044..52810139                   | MIR759     | <a href="#">ENSG00000211579</a> | miRNA | 2.433757099 | 0.00747151  |
| 13 | complement(61952980<br>..61953070)   | AL353765.1 | <a href="#">ENSG00000274645</a> | miRNA | 1.766494283 | 0.03865648  |
| 13 | 72851088..72851169                   | AL391384.1 | <a href="#">ENSG00000220981</a> | miRNA | 3.692375275 | 0.000111085 |
| 13 | 91350891..91350972                   | MIR19A     | <a href="#">ENSG00000277328</a> | miRNA | 2.808187988 | 0.002491057 |
| 13 | 106567662..10656779<br>9             | AL442127.1 | <a href="#">ENSG00000278371</a> | miRNA | 4.49095383  | 3.54525E-06 |
| 13 | complement(10697493<br>8..106975026) | AL354741.1 | <a href="#">ENSG00000239050</a> | miRNA | 2.895914681 | 0.001890276 |



|    |                                  |            |                                 |       |             |             |
|----|----------------------------------|------------|---------------------------------|-------|-------------|-------------|
| 13 | 110340958..110341029             | MIR8073    | <a href="#">ENSG00000276765</a> | miRNA | 2.782214004 | 0.002699471 |
| 14 | 22142926..22143003               | AC245470.1 | <a href="#">ENSG00000238634</a> | miRNA | 2.220610747 | 0.013188669 |
| 14 | complement(22956950..22957029)   | MIR4707    | <a href="#">ENSG00000265037</a> | miRNA | 5.340150574 | 4.64347E-08 |
| 14 | complement(35809212..35809300)   | AL162311.1 | <a href="#">ENSG00000266264</a> | miRNA | 2.686200415 | 0.003613486 |
| 14 | 41952476..41952560               | AL138498.1 | <a href="#">ENSG00000266500</a> | miRNA | 2.026535696 | 0.021354959 |
| 14 | complement(49862547..49862626)   | RN7SL2     | <a href="#">ENSG00000280102</a> | miRNA | 1.794458503 | 0.036370008 |
| 14 | 49966399..49966511               | MIR6076    | <a href="#">ENSG00000278038</a> | miRNA | 1.945507473 | 0.025856966 |
| 14 | complement(53948427..53948484)   | MIR5580    | <a href="#">ENSG00000266431</a> | miRNA | 2.504327237 | 0.006134225 |
| 14 | complement(54878113..54878193)   | MIR4308    | <a href="#">ENSG00000265432</a> | miRNA | 1.906022837 | 0.028323621 |
| 14 | 56075480..56075566               | AL163952.1 | <a href="#">ENSG00000221254</a> | miRNA | 1.773274761 | 0.038091595 |
| 14 | complement(73208378..73208463)   | AC004846.1 | <a href="#">ENSG00000274991</a> | miRNA | 1.700071854 | 0.044558705 |
| 14 | 73758747..73758819               | MIR4505    | <a href="#">ENSG00000264741</a> | miRNA | 1.96669968  | 0.024608922 |
| 14 | complement(74480133..74480204)   | MIR4709    | <a href="#">ENSG00000265649</a> | miRNA | 3.39551049  | 0.000342504 |
| 14 | complement(76348055..76348138)   | AC016543.1 | <a href="#">ENSG00000212061</a> | miRNA | 2.530818102 | 0.005689842 |
| 14 | 95335840..95335943               | AL117187.1 | <a href="#">ENSG00000276090</a> | miRNA | 1.716670139 | 0.04301973  |
| 14 | 100852390..100852487             | MIR770     | <a href="#">ENSG00000211574</a> | miRNA | 2.487830668 | 0.006426246 |
| 14 | 101029611..101029719             | MIR494     | <a href="#">ENSG00000194717</a> | miRNA | 2.137127789 | 0.0162938   |
| 14 | 101033734..101033841             | MIR495     | <a href="#">ENSG00000207743</a> | miRNA | 1.961303793 | 0.024921798 |
| 14 | 101040219..101040299             | MIR654     | <a href="#">ENSG00000207934</a> | miRNA | 1.87196483  | 0.030605735 |
| 14 | 101041363..101041445             | MIR300     | <a href="#">ENSG00000215957</a> | miRNA | 2.085385194 | 0.018517175 |
| 14 | 101048658..101048748             | MIR544A    | <a href="#">ENSG00000207587</a> | miRNA | 2.280093052 | 0.011301085 |
| 14 | 101054687..101054759             | MIR134     | <a href="#">ENSG00000207993</a> | miRNA | 2.476196956 | 0.006639515 |
| 14 | 102539644..102539726             | MIR4309    | <a href="#">ENSG00000266015</a> | miRNA | 2.137198634 | 0.01629092  |
| 14 | 102879621..102879738             | AL117209.1 | <a href="#">ENSG00000211990</a> | miRNA | 2.111140161 | 0.017380133 |
| 14 | complement(103980798..103980883) | AL136001.1 | <a href="#">ENSG00000264439</a> | miRNA | 2.24583688  | 0.012357229 |
| 14 | complement(105857573..105857632) | AC246787.5 | <a href="#">ENSG00000266706</a> | miRNA | 2.804613625 | 0.002518846 |
| 14 | complement(105858165..105858242) | MIR4538    | <a href="#">ENSG00000263413</a> | miRNA | 3.148672822 | 0.000820069 |
| 14 | complement(105858335..105858412) | AC246787.1 | <a href="#">ENSG00000263751</a> | miRNA | 3.157562535 | 0.000795471 |
| 15 | 20358108..20358181               | AC026495.1 | <a href="#">ENSG00000265002</a> | miRNA | 3.248126717 | 0.000580838 |
| 15 | 23364444..23364526               | AC100756.1 | <a href="#">ENSG00000238737</a> | miRNA | 2.448978893 | 0.007163092 |
| 15 | 43519409..43519489               | AC019011.1 | <a href="#">ENSG00000275702</a> | miRNA | 1.723784513 | 0.042373376 |
| 15 | 45433050..45433129               | MIR147B    | <a href="#">ENSG00000211519</a> | miRNA | 3.170853667 | 0.000759958 |
| 15 | complement(46957533..46957617)   | AC087433.1 | <a href="#">ENSG00000252500</a> | miRNA | 2.783014621 | 0.002692819 |
| 15 | complement(63870930..63871019)   | MIR422A    | <a href="#">ENSG00000199156</a> | miRNA | 4.174095814 | 1.49586E-05 |
| 15 | 66040233..66040332               | MIR4311    | <a href="#">ENSG00000263512</a> | miRNA | 3.482000881 | 0.000248841 |
| 15 | complement(68801850..68801925)   | MIR4312    | <a href="#">ENSG00000265195</a> | miRNA | 2.257847485 | 0.011977585 |
| 15 | 69160651..69160724               | AC026512.1 | <a href="#">ENSG00000266374</a> | miRNA | 3.421925452 | 0.000310897 |
| 15 | complement(69730740..69730822)   | AC009677.1 | <a href="#">ENSG00000238870</a> | miRNA | 4.587959496 | 2.238E-06   |
| 15 | complement(74115396..74115469)   | AC010931.1 | <a href="#">ENSG00000274013</a> | miRNA | 2.303630917 | 0.010621685 |
| 15 | 75012418..75012484               | AC015720.1 | <a href="#">ENSG00000273798</a> | miRNA | 3.539972051 | 0.000200085 |
| 15 | 79209788..79209871               | MIR184     | <a href="#">ENSG00000207695</a> | miRNA | 3.023879432 | 0.001247779 |
| 15 | complement(82847870..82847998)   | AC044907.1 | <a href="#">ENSG00000280753</a> | miRNA | 2.339478336 | 0.009655346 |
| 15 | complement(85770496..85770578)   | MIR1276    | <a href="#">ENSG00000221634</a> | miRNA | 1.853900264 | 0.031876715 |
| 15 | complement(93286235..93286323)   | AC112693.1 | <a href="#">ENSG00000212063</a> | miRNA | 2.136856085 | 0.016304849 |
| 15 | 96333261..96333307               | MIR1469    | <a href="#">ENSG00000222651</a> | miRNA | 3.420073753 | 0.000313021 |
| 15 | 98784426..98784502               | MIR4714    | <a href="#">ENSG00000264480</a> | miRNA | 3.466348556 | 0.000263789 |
| 15 | 99257539..99257670               | AC022819.1 | <a href="#">ENSG00000264771</a> | miRNA | 1.662711846 | 0.048185065 |

|    |                                      |            |                        |       |             |             |
|----|--------------------------------------|------------|------------------------|-------|-------------|-------------|
| 15 | complement(10177230<br>0..101772381) | AC107977.2 | <u>ENSG00000277814</u> | miRNA | 1.760369677 | 0.039172574 |
| 16 | complement(1379289..<br>1379423)     | AL031721.1 | <u>ENSG00000265529</u> | miRNA | 1.917810742 | 0.027567507 |
| 16 | complement(2090195..<br>2090284)     | MIR1225    | <u>ENSG00000221656</u> | miRNA | 2.626710348 | 0.004310734 |
| 16 | complement(2205030..<br>2205136)     | AC009065.2 | <u>ENSG00000252958</u> | miRNA | 1.73395339  | 0.041463177 |
| 16 | 2769872..2769949                     | AC092117.2 | <u>ENSG00000265864</u> | miRNA | 2.15388358  | 0.015624651 |
| 16 | 15643281..15643390                   | MIR484     | <u>ENSG00000272213</u> | miRNA | 2.123716348 | 0.016846935 |
| 16 | 30893903..30893985                   | MIR762     | <u>ENSG00000211591</u> | miRNA | 1.992798706 | 0.023141747 |
| 16 | 34159185..34159299                   | AC136932.1 | <u>ENSG00000207986</u> | miRNA | 2.000473498 | 0.022724579 |
| 16 | 56245520..56245623                   | MIR3935    | <u>ENSG00000265281</u> | miRNA | 1.731186343 | 0.041709267 |
| 16 | 56957265..56957361                   | AC012181.1 | <u>ENSG00000263441</u> | miRNA | 2.569564563 | 0.005091321 |
| 16 | complement(67202308<br>..67202418)   | MIR328     | <u>ENSG00000207948</u> | miRNA | 1.926103838 | 0.027045705 |
| 16 | complement(77436012<br>..77436100)   | AC025284.1 | <u>ENSG00000216131</u> | miRNA | 2.550295524 | 0.005381582 |
| 16 | 82688931..82689019                   | MIR8058    | <u>ENSG00000277387</u> | miRNA | 1.66311393  | 0.048144816 |
| 16 | complement(88716278<br>..88716337)   | MIR4722    | <u>ENSG00000265672</u> | miRNA | 4.364673509 | 6.36564E-06 |
| 17 | complement(155168..1<br>55255)       | AC108004.1 | <u>ENSG00000273288</u> | miRNA | 2.271459367 | 0.011559592 |
| 17 | complement(7017615..<br>7017701)     | MIR195     | <u>ENSG00000275739</u> | miRNA | 1.982594562 | 0.023706368 |
| 17 | complement(7251969..<br>7252099)     | AC003688.1 | <u>ENSG00000281419</u> | miRNA | 3.342358233 | 0.000415349 |
| 17 | complement(10995707<br>..10995773)   | AC005284.2 | <u>ENSG00000281891</u> | miRNA | 2.253881547 | 0.01210181  |
| 17 | complement(11267305<br>..11267379)   | AC005725.1 | <u>ENSG00000253002</u> | miRNA | 1.904069922 | 0.028450539 |
| 17 | 21577818..21577905                   | AC233702.1 | <u>ENSG00000216100</u> | miRNA | 1.711831096 | 0.0434639   |
| 17 | complement(22295293<br>..22295380)   | AC138761.1 | <u>ENSG00000222770</u> | miRNA | 2.22062353  | 0.013188235 |
| 17 | 28360654..28360734                   | MIR4723    | <u>ENSG00000264302</u> | miRNA | 1.835363868 | 0.033225897 |
| 17 | complement(28861655<br>..28861730)   | MIR4732    | <u>ENSG00000278521</u> | miRNA | 2.419298501 | 0.007775237 |
| 17 | 29390662..29390730                   | MIR4523    | <u>ENSG00000263719</u> | miRNA | 2.083456704 | 0.018604807 |
| 17 | 30117079..30117172                   | MIR423     | <u>ENSG00000199071</u> | miRNA | 3.146023698 | 0.000827533 |
| 17 | 31559996..31560083                   | MIR193A    | <u>ENSG00000207614</u> | miRNA | 2.239275823 | 0.012568987 |
| 17 | 31575411..31575521                   | MIR365B    | <u>ENSG00000199187</u> | miRNA | 2.097650502 | 0.017968015 |
| 17 | 32350109..32350202                   | MIR632     | <u>ENSG00000207928</u> | miRNA | 2.705981966 | 0.003405137 |
| 17 | complement(38702262<br>..38702331)   | MIR4734    | <u>ENSG00000275238</u> | miRNA | 2.229678813 | 0.012884387 |
| 17 | 38825838..38825892                   | MIR4727    | <u>ENSG00000274054</u> | miRNA | 1.88136496  | 0.029961145 |
| 17 | complement(41517164<br>..41517217)   | MIR6510    | <u>ENSG00000276252</u> | miRNA | 5.700893216 | 5.95906E-09 |
| 17 | complement(44207771<br>..44207839)   | MIR6782    | <u>ENSG00000275107</u> | miRNA | 2.403581142 | 0.008117682 |
| 17 | complement(45114367<br>..45114433)   | MIR6784    | <u>ENSG00000277249</u> | miRNA | 2.788364509 | 0.002648745 |
| 17 | complement(56891270<br>..56891355)   | MIR3614    | <u>ENSG00000265238</u> | miRNA | 3.641741338 | 0.0001354   |
| 17 | complement(57488508<br>..57488598)   | AC015883.1 | <u>ENSG00000278285</u> | miRNA | 1.893793789 | 0.029126193 |
| 17 | complement(75784521<br>..75784607)   | MIR4738    | <u>ENSG00000263565</u> | miRNA | 2.074601502 | 0.019011741 |
| 17 | complement(76736450<br>..76736548)   | MIR636     | <u>ENSG00000207556</u> | miRNA | 1.89264687  | 0.029202423 |
| 17 | complement(77396984<br>..77397054)   | MIR4316    | <u>ENSG00000264060</u> | miRNA | 3.269692918 | 0.000538321 |
| 17 | complement(81400716<br>..81400778)   | MIR4740    | <u>ENSG00000266392</u> | miRNA | 2.602583833 | 0.00462621  |
| 17 | 82236668..82236728                   | MIR6787    | <u>ENSG00000275505</u> | miRNA | 1.696920754 | 0.044855822 |
| 18 | complement(112256..1<br>12339)       | MIR8078    | <u>ENSG00000277521</u> | miRNA | 29.39781773 | 2.93E-190   |
| 18 | complement(8227103..<br>8227185)     | AP005227.1 | <u>ENSG00000212067</u> | miRNA | 1.980234104 | 0.023838615 |
| 18 | 13611114..13611200                   | MIR4526    | <u>ENSG00000263527</u> | miRNA | 1.743505603 | 0.040622668 |
| 18 | 29196441..29196527                   | AC105245.1 | <u>ENSG00000212085</u> | miRNA | 1.664216938 | 0.048034542 |
| 18 | complement(35934088<br>..35934142)   | MIR3929    | <u>ENSG00000265641</u> | miRNA | 2.853956309 | 0.002158923 |
| 18 | 37657135..37657215                   | MIR4318    | <u>ENSG00000266530</u> | miRNA | 2.07492246  | 0.018996861 |
| 18 | 48670582..48670693                   | AC048380.1 | <u>ENSG00000266276</u> | miRNA | 2.906842044 | 0.001825488 |
| 18 | 49487373..49487422                   | MIR1539    | <u>ENSG00000278544</u> | miRNA | 2.560887346 | 0.00522026  |
| 18 | complement(75753580<br>..75753665)   | AC090338.1 | <u>ENSG00000277497</u> | miRNA | 4.055707143 | 2.49914E-05 |

|    |                                |            |                                 |       |             |             |
|----|--------------------------------|------------|---------------------------------|-------|-------------|-------------|
| 19 | complement(1816159..1816238)   | MIR1909    | <a href="#">ENSG00000223244</a> | miRNA | 3.213151064 | 0.000656436 |
| 19 | 2630715..2630793               | MIR7850    | <a href="#">ENSG00000277904</a> | miRNA | 1.675876404 | 0.046881202 |
| 19 | 7617439..7617505               | MIR6792    | <a href="#">ENSG00000273657</a> | miRNA | 2.305747496 | 0.010562373 |
| 19 | 10718404..10718503             | MIR638     | <a href="#">ENSG00000207972</a> | miRNA | 2.684530137 | 0.003631592 |
| 19 | 10828973..10829035             | MIR6793    | <a href="#">ENSG00000275640</a> | miRNA | 2.820519759 | 0.002397296 |
| 19 | complement(11495544..11495622) | MIR7974    | <a href="#">ENSG00000274713</a> | miRNA | 4.504930892 | 3.32E-06    |
| 19 | 12787128..12787192             | MIR5684    | <a href="#">ENSG00000263800</a> | miRNA | 2.796842571 | 0.002580234 |
| 19 | 12958855..12958947             | AC092069.1 | <a href="#">ENSG00000280662</a> | miRNA | 1.67408443  | 0.047057004 |
| 19 | complement(13836287..13836359) | MIR24-2    | <a href="#">ENSG00000276797</a> | miRNA | 3.109976526 | 0.000935511 |
| 19 | complement(13836440..13836517) | MIR27A     | <a href="#">ENSG00000207808</a> | miRNA | 2.851677928 | 0.002174457 |
| 19 | 14073361..14073479             | MIR1199    | <a href="#">ENSG00000277805</a> | miRNA | 2.08305358  | 0.01862317  |
| 19 | 15052930..15053074             | AC004699.1 | <a href="#">ENSG00000223201</a> | miRNA | 1.736981313 | 0.041195235 |
| 19 | complement(20027027..20027117) | AC006539.1 | <a href="#">ENSG00000264441</a> | miRNA | 2.750159153 | 0.002978316 |
| 19 | 20302590..20302672             | AC078899.2 | <a href="#">ENSG00000266609</a> | miRNA | 1.782350534 | 0.037346043 |
| 19 | 22602706..22602788             | AC011467.1 | <a href="#">ENSG00000221790</a> | miRNA | 2.749645314 | 0.00298299  |
| 19 | 35345513..35345627             | MIR5196    | <a href="#">ENSG00000263397</a> | miRNA | 1.768254442 | 0.038509188 |
| 19 | 41869627..41869698             | MIR6797    | <a href="#">ENSG00000276926</a> | miRNA | 3.761070308 | 8.45939E-05 |
| 19 | 44758657..44758721             | MIR8085    | <a href="#">ENSG00000277736</a> | miRNA | 3.868436233 | 5.47678E-05 |
| 19 | complement(45638994..45639087) | MIR330     | <a href="#">ENSG00000199066</a> | miRNA | 1.647975084 | 0.049678892 |
| 19 | 49266483..49266568             | AC011450.1 | <a href="#">ENSG00000265023</a> | miRNA | 1.967208392 | 0.024579559 |
| 19 | 49791866..49791934             | MIR6799    | <a href="#">ENSG00000276270</a> | miRNA | 3.079237677 | 0.001037655 |
| 19 | 51692773..51692881             | MIRLET7E   | <a href="#">ENSG00000198972</a> | miRNA | 1.669668258 | 0.047492509 |
| 19 | 53675711..53675797             | MIR520E    | <a href="#">ENSG00000207599</a> | miRNA | 2.11187565  | 0.017348558 |
| 19 | 53679940..53680023             | MIR519E    | <a href="#">ENSG00000207810</a> | miRNA | 2.065533115 | 0.019436293 |
| 19 | 53686469..53686555             | MIR519C    | <a href="#">ENSG00000207788</a> | miRNA | 2.843427678 | 0.002231557 |
| 19 | 53702737..53702819             | MIR518B    | <a href="#">ENSG00000207862</a> | miRNA | 2.192631949 | 0.014166954 |
| 19 | 53726922..53726986             | MIR526A2   | <a href="#">ENSG00000211532</a> | miRNA | 2.267707727 | 0.011673513 |
| 19 | 53758232..53758318             | MIR1283-2  | <a href="#">ENSG00000221548</a> | miRNA | 2.011578764 | 0.02213218  |
| 19 | complement(55230885..55230952) | MIR6804    | <a href="#">ENSG00000275519</a> | miRNA | 2.158718088 | 0.015436022 |
| 19 | complement(55239912..55239976) | MIR6802    | <a href="#">ENSG00000278328</a> | miRNA | 2.11032839  | 0.01741504  |
| 19 | complement(58386770..58386858) | MIR4754    | <a href="#">ENSG00000266640</a> | miRNA | 1.873659357 | 0.030488696 |
| 20 | complement(5992260..5992353)   | AL035461.1 | <a href="#">ENSG00000263473</a> | miRNA | 3.735388536 | 9.37128E-05 |
| 20 | 7371608..7371692               | MIR8062    | <a href="#">ENSG00000278159</a> | miRNA | 3.042679065 | 0.001172411 |
| 20 | complement(10649636..10649695) | MIR6870    | <a href="#">ENSG00000273745</a> | miRNA | 2.836741145 | 0.002278827 |
| 20 | complement(13509635..13509744) | AL158089.1 | <a href="#">ENSG00000275098</a> | miRNA | 2.697781696 | 0.00349016  |
| 20 | complement(15558380..15558468) | AL121584.1 | <a href="#">ENSG00000212111</a> | miRNA | 1.965203142 | 0.024695365 |
| 20 | complement(18169905..18169989) | AL050321.1 | <a href="#">ENSG00000251713</a> | miRNA | 2.897113531 | 0.001883067 |
| 20 | complement(18545708..18545784) | AL121893.1 | <a href="#">ENSG00000264134</a> | miRNA | 1.679266678 | 0.046550041 |
| 20 | complement(19734816..19734909) | AL121761.1 | <a href="#">ENSG00000239120</a> | miRNA | 2.274673977 | 0.011462747 |
| 20 | complement(30901749..30901821) | AC104301.2 | <a href="#">ENSG00000277204</a> | miRNA | 2.385675198 | 0.0085239   |
| 20 | 47166967..47167058             | MIR3616    | <a href="#">ENSG00000264901</a> | miRNA | 2.871453863 | 0.002042942 |
| 20 | 47570935..47571015             | AL021394.1 | <a href="#">ENSG00000221294</a> | miRNA | 1.947135429 | 0.02575925  |
| 20 | 47651067..47651156             | AL034418.1 | <a href="#">ENSG00000280970</a> | miRNA | 2.803648749 | 0.002526396 |
| 20 | 50585786..50585879             | MIR645     | <a href="#">ENSG00000208018</a> | miRNA | 2.873341952 | 0.002030771 |
| 20 | 50938646..50938732             | AL034553.1 | <a href="#">ENSG00000265582</a> | miRNA | 3.777489863 | 7.92085E-05 |
| 20 | 52241185..52241266             | AL121923.1 | <a href="#">ENSG00000276817</a> | miRNA | 2.253724421 | 0.012106755 |
| 20 | 57976018..57976093             | AL354984.3 | <a href="#">ENSG00000221451</a> | miRNA | 3.397088942 | 0.000340534 |
| 20 | complement(58817615..58817694) | MIR296     | <a href="#">ENSG00000276373</a> | miRNA | 2.253751899 | 0.01210589  |
| 20 | 60478111..60478181             | MIR4533    | <a href="#">ENSG00000266140</a> | miRNA | 2.146706234 | 0.015908338 |
| 20 | complement(62332487..62332557) | MIR4758    | <a href="#">ENSG00000265329</a> | miRNA | 2.235378018 | 0.012696271 |
| 20 | 62564912..62565013             | MIR133A2   | <a href="#">ENSG00000207764</a> | miRNA | 2.754523561 | 0.002938883 |
| 20 | complement(63941465..63941544) | MIR1914    | <a href="#">ENSG00000272045</a> | miRNA | 3.25453168  | 0.000567897 |
| 20 | complement(64076955..64077010) | MIR6813    | <a href="#">ENSG00000274034</a> | miRNA | 2.792482304 | 0.002615266 |
| 21 | 8208844..8208904               | MIR3687-1  | <a href="#">ENSG00000277437</a> | miRNA | 3.802945756 | 7.14928E-05 |
| 21 | 8435707..8435886               | FP236383.5 | <a href="#">ENSG00000275783</a> | miRNA | 3.402179407 | 0.000334254 |

|    |                                      |            |                        |       |             |             |
|----|--------------------------------------|------------|------------------------|-------|-------------|-------------|
| 21 | 9553503..9553572                     | AC124864.1 | <u>ENSG00000277827</u> | miRNA | 2.122002654 | 0.016918758 |
| 21 | 10460442..10460546                   | AF254983.1 | <u>ENSG00000277137</u> | miRNA | 4.007713091 | 3.06548E-05 |
| 21 | 13985447..13985519                   | AP001634.1 | <u>ENSG00000266838</u> | miRNA | 2.394262063 | 0.008326922 |
| 21 | 16539089..16539169                   | MIR99A     | <u>ENSG00000207638</u> | miRNA | 2.268288191 | 0.011655824 |
| 21 | complement(18704371<br>..18704454)   | AP001537.1 | <u>ENSG00000221041</u> | miRNA | 2.313169787 | 0.010356653 |
| 21 | 35720715..35720808                   | MIR802     | <u>ENSG00000211590</u> | miRNA | 2.186600183 | 0.014385862 |
| 21 | 39447010..39447069                   | MIR6508    | <u>ENSG00000275523</u> | miRNA | 5.54415867  | 1.47685E-08 |
| 21 | 45478266..45478326                   | MIR6815    | <u>ENSG00000275167</u> | miRNA | 2.310381233 | 0.010433529 |
| 22 | 11456856..11456937                   | CU013544.1 | <u>ENSG00000273663</u> | miRNA | 2.594378694 | 0.004738102 |
| 22 | complement(12780120<br>..12780203)   | CU463998.2 | <u>ENSG00000275065</u> | miRNA | 2.124868496 | 0.016798794 |
| 22 | 16232345..16232425                   | AC092854.1 | <u>ENSG00000278335</u> | miRNA | 2.803766431 | 0.002525474 |
| 22 | complement(25532720<br>..25532809)   | AL008721.1 | <u>ENSG00000265978</u> | miRNA | 1.671921615 | 0.04726989  |
| 22 | complement(25883074<br>..25883161)   | Z98949.1   | <u>ENSG00000264925</u> | miRNA | 3.618498475 | 0.000148159 |
| 22 | complement(27920525<br>..27920612)   | MIR3199-1  | <u>ENSG00000264073</u> | miRNA | 2.261064143 | 0.011877643 |
| 22 | complement(29126261<br>..29126404)   | Z95116.1   | <u>ENSG00000281592</u> | miRNA | 1.739652796 | 0.040960001 |
| 22 | 29883860..29883945                   | AC004819.1 | <u>ENSG00000278841</u> | miRNA | 2.731079709 | 0.00315636  |
| 22 | 29944206..29944299                   | AC003681.1 | <u>ENSG00000221736</u> | miRNA | 2.387240143 | 0.008487699 |
| 22 | complement(31621467<br>..31621531)   | MIR7109    | <u>ENSG00000275382</u> | miRNA | 3.013006295 | 0.001293368 |
| 22 | 35335640..35335758                   | MIR3909    | <u>ENSG00000266320</u> | miRNA | 1.708911499 | 0.043733672 |
| 22 | complement(37844272<br>..37844371)   | MIR658     | <u>ENSG00000207945</u> | miRNA | 3.1860078   | 0.000721254 |
| 22 | complement(37847678<br>..37847774)   | MIR659     | <u>ENSG00000207696</u> | miRNA | 2.443388996 | 0.007275022 |
| 22 | complement(45200938<br>..45201049)   | MIR1249    | <u>ENSG00000221598</u> | miRNA | 3.851735535 | 5.86418E-05 |
| 22 | 46091044..46091126                   | MIR3619    | <u>ENSG00000266533</u> | miRNA | 2.325875956 | 0.010012585 |
| 22 | 48274364..48274415                   | MIR3201    | <u>ENSG00000266508</u> | miRNA | 5.323938072 | 5.07722E-08 |
| 22 | 48780295..48780353                   | MIR4535    | <u>ENSG00000266887</u> | miRNA | 2.288754989 | 0.011046796 |
| X  | 1292094..1292167                     | BX649553.4 | <u>ENSG00000264819</u> | miRNA | 2.761021713 | 0.002881042 |
| X  | 71141185..71141306                   | AL590764.1 | <u>ENSG00000265597</u> | miRNA | 2.049616157 | 0.020200951 |
| X  | complement(77005404<br>..77005501)   | MIR325     | <u>ENSG00000207995</u> | miRNA | 1.720897874 | 0.042634679 |
| X  | complement(11302442<br>9..113024506) | AL023876.1 | <u>ENSG00000221175</u> | miRNA | 2.093862629 | 0.01813611  |
| X  | 119524455..11952456<br>3             | AC004000.2 | <u>ENSG00000277275</u> | miRNA | 1.713990357 | 0.043265248 |
| X  | 121370972..12137105<br>3             | MIR3672    | <u>ENSG00000265456</u> | miRNA | 2.248077189 | 0.012285634 |
| X  | 123017819..12301790<br>9             | AL109800.1 | <u>ENSG00000263845</u> | miRNA | 2.897240976 | 0.001882302 |
| X  | 123465093..12346517<br>7             | AL356213.1 | <u>ENSG00000265082</u> | miRNA | 1.908721126 | 0.028149038 |
| X  | 131996845..13199693<br>3             | KF459411.1 | <u>ENSG00000265686</u> | miRNA | 2.045775696 | 0.020389222 |
| X  | complement(13416967<br>1..134169767) | MIR19B2    | <u>ENSG00000207812</u> | miRNA | 1.720956363 | 0.042629371 |
| X  | complement(13440329<br>8..134403382) | AL591668.1 | <u>ENSG00000251962</u> | miRNA | 1.990559945 | 0.023264644 |
| Y  | 10196372..10196484                   | AC010970.1 | <u>ENSG00000251966</u> | miRNA | 2.064227091 | 0.019498095 |
| Y  | 11308274..11308351                   | AC134882.1 | <u>ENSG00000273534</u> | miRNA | 24.16698495 | 2.4751E-129 |
| Y  | 11316278..11316360                   | AC134882.2 | <u>ENSG00000276079</u> | miRNA | 33.9608903  | 4.2122E-253 |
| Y  | 11333688..11333771                   | AC134882.3 | <u>ENSG00000277716</u> | miRNA | 55.77751651 | 0           |
