# Supplementary material for: Vitamin D stimulates multiple microRNAs to inhibit CRH and other pro-labor genes in human placenta
Source: PubMed Central journal article supplement — Endocr Connect. 2018 Nov 5;7(12):1380–8. doi: 10.1530/EC-18-0345 (PMC6280586; doi:10.1530/ec-18-0345), 2018-11-05
Supplement: EC-18-0345-t002.pdf [file EC-18-0345-t002.pdf]

**Supplementary Table 2. MicroRNAs Predicted to Target Human *CRH***

| Mature miRNAs                                                                                             | Stimulated by 1,25(OH) <sub>2</sub> D-VDR | Annotation Confidence by miRBase | Validated in Humans |
|-----------------------------------------------------------------------------------------------------------|-------------------------------------------|----------------------------------|---------------------|
| hsa-miR-4287                                                                                              | Yes                                       | Undefined                        | No                  |
| hsa-miR-6845-3p                                                                                           | Yes                                       | Undefined                        | No                  |
| hsa-miR-4723-3p                                                                                           | Yes                                       | Undefined                        | No                  |
| hsa-miR-4289                                                                                              | Yes                                       | Undefined                        | No                  |
| hsa-miR-619-3p                                                                                            | Yes                                       | Undefined                        | No                  |
| hsa-miR-4753-3p                                                                                           | Yes                                       | Undefined                        | No                  |
| <b>hsa-miR-181b-5p</b>                                                                                    | <b>Yes</b>                                | <b>Defined</b>                   | <b>Yes</b>          |
| hsa-miR-1229-3p                                                                                           | Yes                                       | Undefined                        | No                  |
| hsa-miR-632                                                                                               | Yes                                       | Undefined                        | No                  |
| hsa-miR-4658                                                                                              | Yes                                       | Undefined                        | No                  |
| hsa-miR-4758-5p                                                                                           | Yes                                       | Undefined                        | No                  |
| hsa-miR-1276                                                                                              | Yes                                       | Undefined                        | No                  |
| hsa-miR-7159-5p                                                                                           | Yes                                       | Undefined                        | No                  |
| hsa-miR-3121-5p                                                                                           | Yes                                       | Undefined                        | No                  |
| hsa-miR-6782-3p                                                                                           | Yes                                       | Undefined                        | No                  |
| <b>MicroRNA below are predicted to target <i>CRH</i>, but not stimulated by 1,25(OH)<sub>2</sub>D-VDR</b> |                                           |                                  |                     |
| hsa-miR-10b                                                                                               |                                           |                                  |                     |
| hsa-miR-218                                                                                               |                                           |                                  |                     |
| hsa-miR-2113                                                                                              |                                           |                                  |                     |
| hsa-miR-5010                                                                                              |                                           |                                  |                     |
| hsa-miR-129                                                                                               |                                           |                                  |                     |
| hsa-miR-3606                                                                                              |                                           |                                  |                     |
| hsa-miR-513a                                                                                              |                                           |                                  |                     |
| hsa-miR-513c                                                                                              |                                           |                                  |                     |
| hsa-miR-4742-3p                                                                                           |                                           |                                  |                     |
| hsa-miR-1183                                                                                              |                                           |                                  |                     |
| hsa-miR-429                                                                                               |                                           |                                  |                     |
| hsa-miR-200c-3p                                                                                           |                                           |                                  |                     |
| hsa-miR-200b-3p                                                                                           |                                           |                                  |                     |
| hsa-miR-150-3p                                                                                            |                                           |                                  |                     |
| hsa-miR-5579-5p                                                                                           |                                           |                                  |                     |
| hsa-miR-503-5p                                                                                            |                                           |                                  |                     |
| hsa-miR-2278                                                                                              |                                           |                                  |                     |
| hsa-miR-5197-5p                                                                                           |                                           |                                  |                     |
| hsa-miR-7-2-3p                                                                                            |                                           |                                  |                     |
| hsa-miR-7-1-3p                                                                                            |                                           |                                  |                     |
| hsa-miR-548c-3p                                                                                           |                                           |                                  |                     |
| hsa-miR-3163                                                                                              |                                           |                                  |                     |
| hsa-miR-410-3p                                                                                            |                                           |                                  |                     |
| hsa-miR-498                                                                                               |                                           |                                  |                     |
| hsa-miR-4307                                                                                              |                                           |                                  |                     |
| hsa-miR-642a-5p                                                                                           |                                           |                                  |                     |
| hsa-miR-2276-5p                                                                                           |                                           |                                  |                     |
| hsa-miR-6892-3p                                                                                           |                                           |                                  |                     |
| hsa-miR-4469                                                                                              |                                           |                                  |                     |
| hsa-miR-6741-3p                                                                                           |                                           |                                  |                     |
| hsa-miR-6867-3p                                                                                           |                                           |                                  |                     |
| hsa-miR-4685-3p                                                                                           |                                           |                                  |                     |
| hsa-miR-7113-3p                                                                                           |                                           |                                  |                     |
| hsa-miR-7110-3p                                                                                           |                                           |                                  |                     |
| hsa-miR-3183                                                                                              |                                           |                                  |                     |
| hsa-miR-6769b-3p                                                                                          |                                           |                                  |                     |
| hsa-miR-1295b-3p                                                                                          |                                           |                                  |                     |
| hsa-miR-3936                                                                                              |                                           |                                  |                     |

|                  |  |  |  |
|------------------|--|--|--|
| hsa-miR-4639-5p  |  |  |  |
| hsa-miR-3143     |  |  |  |
| hsa-miR-543      |  |  |  |
| hsa-miR-548ad-3p |  |  |  |
| hsa-miR-1277-3p  |  |  |  |
| hsa-miR-191-5p   |  |  |  |
| hsa-miR-4261     |  |  |  |
| hsa-miR-875-3p   |  |  |  |
| hsa-miR-6765-3p  |  |  |  |
| hsa-miR-3591-3p  |  |  |  |
| hsa-miR-21-3p    |  |  |  |
| hsa-miR-302d-5p  |  |  |  |
| hsa-miR-302b-5p  |  |  |  |
| hsa-miR-130b-5p  |  |  |  |
| hsa-miR-6809-3p  |  |  |  |
| hsa-miR-4262     |  |  |  |
| hsa-miR-181d-5p  |  |  |  |
| hsa-miR-181c-5p  |  |  |  |
| hsa-miR-181a-5p  |  |  |  |
| hsa-miR-3618     |  |  |  |
| hsa-miR-513a-5p  |  |  |  |
| hsa-miR-342-3p   |  |  |  |
| hsa-miR-424-3p   |  |  |  |
| hsa-miR-6715b-3p |  |  |  |
| hsa-miR-607      |  |  |  |
| hsa-miR-1305     |  |  |  |
| hsa-miR-335-3p   |  |  |  |
| hsa-miR-3140-3p  |  |  |  |
| hsa-miR-4288     |  |  |  |
| hsa-miR-346      |  |  |  |
| hsa-miR-3120-5p  |  |  |  |
| hsa-miR-6888-3p  |  |  |  |
| hsa-miR-4743-3p  |  |  |  |
| hsa-miR-3182     |  |  |  |
| hsa-miR-6505-3p  |  |  |  |
| hsa-miR-617      |  |  |  |
| hsa-miR-6820-3p  |  |  |  |
| hsa-miR-3164     |  |  |  |
| hsa-miR-1236-5p  |  |  |  |
| hsa-miR-4765     |  |  |  |
| hsa-miR-6790-5p  |  |  |  |
| hsa-miR-1238-5p  |  |  |  |
| hsa-miR-7849-3p  |  |  |  |
| hsa-miR-3065-5p  |  |  |  |
| hsa-miR-3529-3p  |  |  |  |
| hsa-miR-5003-5p  |  |  |  |
| hsa-miR-24-3p    |  |  |  |
| hsa-miR-4284     |  |  |  |
| hsa-miR-8057     |  |  |  |
| hsa-miR-9-5p     |  |  |  |
| hsa-miR-1256     |  |  |  |
| hsa-miR-3123     |  |  |  |
| hsa-miR-5591-3p  |  |  |  |
| hsa-miR-550a-3p  |  |  |  |
| hsa-miR-200c-5p  |  |  |  |
| hsa-miR-4474-5p  |  |  |  |
| hsa-miR-5683     |  |  |  |
| hsa-miR-600      |  |  |  |
| hsa-miR-27b-5p   |  |  |  |

|                  |  |  |  |
|------------------|--|--|--|
| hsa-miR-382-5p   |  |  |  |
| hsa-miR-4724-5p  |  |  |  |
| hsa-miR-556-3p   |  |  |  |
| hsa-miR-3978     |  |  |  |
| hsa-miR-4515     |  |  |  |
| hsa-miR-3169     |  |  |  |
| hsa-miR-4801     |  |  |  |
| hsa-miR-4731-3p  |  |  |  |
| hsa-miR-466      |  |  |  |
| hsa-miR-4672     |  |  |  |
| hsa-miR-3941     |  |  |  |
| hsa-miR-421      |  |  |  |
| hsa-miR-505-3p.2 |  |  |  |
| hsa-miR-4272     |  |  |  |
| hsa-miR-4477a    |  |  |  |
| hsa-miR-891b     |  |  |  |
| hsa-miR-450b-5p  |  |  |  |
| hsa-miR-4724-3p  |  |  |  |
